# Supplementary material
Source: PubMed Central journal article supplement (PMC4544822)
Supplement: Supp_Figure1.pdf [file Supp_Figure1.pdf]

## Supplementary Data

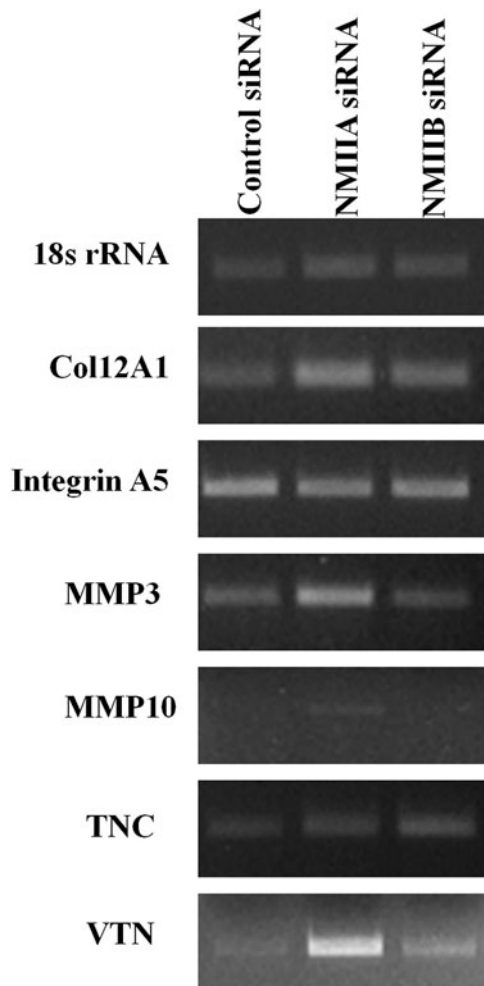

**SUPPLEMENTARY FIG. S1.** RT-PCR analysis of WJ-derived MSCs treated with control, NMIIA, or NMIIB siRNA. 18s rRNA was used as an internal control. Results are representative of at least two independent biological or donor samples. MSCs, mesenchymal stem cells; NMII, nonmuscle myosin II; RT-PCR, reverse transcription-polymerase chain reaction; WJ, Wharton's jelly.
